1 **Endogenous TDP-43 prevents retrotransposons activation through**  
2 **Dicer-2 activity and the RNA silencing machinery in Drosophila**  
3 **neurons**

4

5 Giulia Romano, Raffaella Klima and Fabian Feiguin\*

6

7 International Centre for Genetic Engineering and Biotechnology, Padriciano 99, 34149  
8 Trieste, Italy.

9

10

11 \* Corresponding author

12 E-mail: [fabian.feiguin@icgeb.org](mailto:fabian.feiguin@icgeb.org)

13 Phone: +39-040-3757201

14 Fax: +39-040-226555

15

16 **ABSTRACT**

17

18 **The aberrant expression of retrotransposable elements (RTEs) was observed in**  
19 **different neurodegenerative diseases including amyotrophic lateral sclerosis (ALS),**  
20 **a terminal disorder characterized by functional alterations in the small RNA-**  
21 **binding protein TDP-43, suggesting that these events might be connected. Using**  
22 **genome wide gene expression profiles, we detected RTEs highly upregulated in**  
23 **TDP-43-null *Drosophila* heads while, the genetic rescue of TDP-43 function reverted**  
24 **these modifications. Furthermore, we found that TDP-43 modulates the small**  
25 **interfering RNA (siRNA) silencing machinery responsible for RTEs repression.**  
26 **Molecularly, we observed that TDP-43 regulates the expression levels of Dicer-2 by**  
27 **direct protein-mRNA interactions *in vivo*. Accordingly, the genetic or**  
28 **pharmacological recovery of Dicer-2 activity was sufficient to repress**  
29 **retrotransposons activation and revert the neurodegeneration in TDP-43-null**  
30 ***Drosophila* motoneurons. Our results, describe a novel physiological role of**  
31 **endogenous TDP-43 in the prevention of RTEs-induced neurodegeneration through**  
32 **the modulation of Dicer-2 activity and the siRNA pathway.**

33

## 34 INTRODUCTION

35

36 Amyotrophic lateral sclerosis (ALS) is a devastating disease that affects the homeostasis  
37 of the motor system, defined by motoneurons and the associated glia, leading to muscles  
38 denervation, progressive paralysis and neurodegeneration. Regarding the pathological  
39 mechanisms of the disease, studies performed in brain tissues obtained from deceased  
40 patients revealed the presence of insoluble aggregates of the small ribonuclear protein  
41 TDP-43 distributed along the cytoplasm and outside the cell nucleus (Arai et al., 2006;  
42 Geser et al., 2009; Neumann et al., 2006). These modifications, strongly correlate with  
43 the symptoms of the disease and were observed in the great majority of the sporadic and  
44 familial cases of ALS (Sreedharan et al., 2008). However, is still a matter of debate how  
45 histological alterations in TDP-43 lead to neurodegeneration. In this direction,  
46 experiments performed in transgenic animals indicated that TDP-43 is an aggregation  
47 prone protein that induce neurodegeneration when overexpressed in neuronal tissues  
48 (Cannon et al., 2012; Igaz et al., 2011; Shan et al., 2010; Tsai et al., 2010; Wils et al.,  
49 2010; Xu et al., 2010). Moreover, analogous research lines showed that TDP-43 variants  
50 carrying mutations linked to familial cases of ALS were more predisposed to form  
51 aggregates and, in addition, more neurotoxic (Janssens et al., 2013; Stallings et al., 2010;  
52 Swarup et al., 2011; Tian et al., 2011; Wegorzewska et al., 2009; Xu et al., 2011). On the  
53 other hand, the formation of insoluble aggregates may also disrupt the physiological  
54 function of the endogenous protein and lead to neurodegeneration through mechanisms  
55 related with the absence of TDP-43 function in the nucleus. In relationship with these  
56 observations, we demonstrated that the suppression of the TDP-43 homolog protein in  
57 *Drosophila* (TBPH), faithfully reproduced in flies the main characteristics of the human  
58 disease alike paralysis, motoneurons degeneration and reduced life span (Feiguin et al.,  
59 2009; Godena et al., 2011). Moreover, we described that TBPH function is permanently  
60 required in neurons and glia to maintain the molecular organization of the neuromuscular  
61 synapses as well as prevent the denervation of the skeletal muscles (Romano et al., 2015,  
62 2014), supporting the idea that deficiencies in TBPH function may conduct to ALS by  
63 interfering with the physiological regulation of critical metabolic pathways inside the  
64 motor system. In order to identify these molecules, we performed a transcriptome  
65 comparison of gene expression profiles between wildtype and TBPH null mutant adult  
66 head tissues. Intriguingly, we observed that the absence of TBPH provoked the  
67 upregulation of notorious families of conserved retrotransposons that included the  
68 endogenous retrovirus (ERV) *gypsy*. In addition, we found that the genetic recovery of  
69 TBPH activity prevented the activation of these elements, revealing that the endogenous  
70 function of TBPH is required for retrotransposons repression. In the present study, we  
71 tested the hypotheses described above and explored the mechanisms regulated by TBPH  
72 in retrotransposons silencing. Moreover, we investigated the neurological consequences  
73 of ERV activation in TBPH-null flies and examined if similar regulatory pathways are  
74 conserved in human neuroblastoma cells. Finally, we tested novel pharmacological  
75 compounds and therapeutic strategies to compensate the defects of TBPH loss of function  
76 in the repression of retrotransposons activation. We hope that our results will provide  
77 novel arguments to understand the disease process and facilitate the way to novel curative  
78 interventions in ALS.

79

80

## 81 RESULTS

82

### 83 **The lack of TBPH induce the expression of retrotransposons in Drosophila**

84 We have previously indicated that the molecular function of TBPH is permanently  
85 required in Drosophila motoneurons to prevent muscles denervation, locomotive defects  
86 and early neurodegeneration (Romano et al., 2014). In order to identify the molecules  
87 involved in the neurodegenerative process initiated by the absence of TBPH, we utilized  
88 *Drosophila melanogaster* to analyze differences in the patterns of gene expression  
89 between wildtype and TBPH minus flies. For these experiments, the mRNAs expressed  
90 in adult heads of TBPH-null alleles (*tbph*<sup>Δ23</sup> and *tbph*<sup>Δ142</sup>) and wildtype controls were  
91 isolated to hybridize GeneChip Drosophila Genome 2.0 Arrays. Intriguingly, the  
92 statistical analysis of these experiments revealed that 12 out of the 79 transposons,  
93 present in the microarray, appeared dysregulated in TBPH-minus alleles compared to  
94 wildtype (Figure 1A and Figure 1-figure supplement 1). Interestingly, we observed that  
95 the great majority of these transposable elements belonged to the long terminal repeat  
96 (LTR) family of retrotransposons. In particular, we found that *accord* and *gypsy* were the  
97 most upregulated LTRs in TBPH mutants (Figure 1A). The modifications described in  
98 the microarray, were independently confirmed by quantitative RT-PCR (qRT-PCR) using  
99 different combinations of primers against the RNA sequences transcribed from these  
100 elements (Figure 1B). In addition we observed that the glycoprotein *env*, codified by  
101 *gypsy* (Song et al., 1994; Teyssset et al., 1998; Touret et al., 2014), emerged upregulated  
102 in TBPH-minus heads compared to controls demonstrating by a different methodology  
103 that the activity of this retrotransposon was increased in mutant tissues (Figure 1C). More  
104 importantly, we found that the genetic expression of the TBPH protein was able to  
105 repress the activation of *accord* and *gypsy* in TBPH mutant backgrounds, demonstrating  
106 that the role of TBPH was rather specific (Figure 1B and C).

107

### 108 **The activation of retrotransposons causes motoneurons degeneration in TBPH-null** 109 **flies**

110 The observations related above indicate that the endogenous function of the TBPH  
111 protein must be required to prevent the activation of retrotransposons *in vivo*.  
112 Furthermore, the data suggests that the mobilization of these elements may contribute to  
113 the phenotypes induced by the absence of TBPH activity in Drosophila neurons. To test  
114 these possibilities, we treated TBPH-null flies with different combinations of nucleoside  
115 and non-nucleoside revert transcriptase inhibitors (NRTI and NNRTI) (Usach et al.,  
116 2013). These compounds, are antiretroviral inhibitors that prevent the replication of  
117 endogenous retrotransposons by interfering with the enzymatic activity of the reverse-  
118 transcriptase or, behaving as chain terminators. As a result, we noticed that the oral  
119 administration of the NRTIs: stavudine, azidotimidine, tenofovir and abacavir, together  
120 with the NNRTI rilpivirine were able to revert the locomotive defects described in  
121 TBPH-minus flies during larvae development (Figure 2A-B and Figure 2-figure  
122 supplement 1A). In addition, we decided to analyze more in details the neurological  
123 consequences of *gypsy* upregulation in TBPH-minus Drosophila. This is because *gypsy* is  
124 a very active retrotransposon in Drosophila, responsible for the majority of the  
125 spontaneous mutations described in flies (Krug et al., 2017; Li et al., 2013; Misseri et al.,

126 2004; Song et al., 1994) and, moreover, *gypsy* presents strong similarities with the viral  
127 protein HERV-K, a human endogenous retrovirus recently detected in patients with ALS  
128 (Douville and Nath, 2017; Li et al., 2015, 2012). Therefore, to test the role of *gypsy* in  
129 TBPH-null phenotypes we decided to silence the expression of this retrotransposon in  
130 *tbph*<sup>Δ23</sup> homozygous flies. For these experiments, we utilized transgenic flies carrying  
131 RNAi constructs against the endogenous mRNA sequence of *gypsy* (*gypsy*-IR) cloned in  
132 UAS expression vectors (31). Consequently, we found that the neuronal expression of  
133 two independent RNAi lines against *gypsy* (*gypsy*-IR<sub>3</sub> and IR<sub>4</sub>), utilizing the pan-neuronal  
134 driver *elav-GAL4* or the more restricted motoneuronal promoter *D42-GAL4*, were able to  
135 significantly revert the locomotive phenotypes observed in TBPH-minus third instar  
136 larvae (*tbph*<sup>Δ23</sup>/*tbph*<sup>Δ23</sup>; *elav-GAL4* or *D42-GAL4/gypsy*-IR<sub>3</sub>-IR<sub>4</sub>) compared to analogous  
137 flies expressing an RNAi against GFP (*tbph*<sup>Δ23</sup>/*tbph*<sup>Δ23</sup>; *elav-GAL4* or *D42-GAL4/GFP*-  
138 IR) (Figure 2C). Surprisingly, we noticed that the genetic rescue of the locomotive  
139 behaviors induced by the suppression of *gypsy* in TBPH-null backgrounds was followed  
140 by the regrowth of the presynaptic terminals and the recovery of the glutamate receptors  
141 clusters present at the postsynaptic membranes (Figure 2D-G), demonstrating that the  
142 abnormal activation of *gypsy* negatively contributes to the maintenance of the  
143 neuromuscular synapses and muscles innervation. Subsequently, we noticed that the  
144 suppression of *gypsy* in glial cells, using *repo-GAL4* (*tbph*<sup>Δ23</sup>/*tbph*<sup>Δ23</sup>; *repo-GAL4/gypsy*-  
145 IR<sub>3</sub>), was not able to modify the degenerative phenotypes provoked by the lack of TBPH  
146 (Figure 2-figure supplement 1B) suggesting that *gypsy* may not be active in these tissues  
147 or, alternatively, the suppression of *gypsy* expression in the glia was not sufficient to  
148 prevent the neurodegeneration.

149

### 150 **TBPH controls retrotransposons silencing by regulating Dicer-2 levels**

151 The retrotransposons, including *gypsy*, have the capacity to transcribe themselves through  
152 RNA intermediates (Ito and Kakutani, 2014; McCullers and Steiniger, 2017). In  
153 physiological conditions, the expression of these elements is maintained under repression  
154 by the synthesis of small interference RNAs, in charged to mediate the post-  
155 transcriptional silencing of the retrotransposons through the formation of RNA-induced  
156 silencing complexes (RISC) (Slotkin and Martienssen, 2007). These siRNAs, present a  
157 typical size of 21-23 nucleotides and complementary sequences against different  
158 retrotransposons were found to be conserved in different species, as well as, present in  
159 different somatic tissues including the brain (Carthew and Sontheimer, 2009; Tabach et  
160 al., 2013). Taking in consideration that the expression levels of *gypsy* were upregulated in  
161 TBPH-null flies, we decided to test whether the siRNA silencing machinery was affected  
162 by the lack of TBPH compared to wildtype controls. For these experiments, we took  
163 advantage of a previously described methodology based on the co-expression of a GFP-  
164 IR construct together with a GFP reporter in transgenic flies (Krug et al., 2017; Tang et  
165 al., 2004).

166 Thus, differences in the expression levels of the GFP reporter were quantified by western  
167 blot and reflected the efficiency of the RNA silencing machineries in different tissues and  
168 genetic backgrounds. Accordingly, we utilized *D42-GAL4* to express the constructs  
169 described above and observed that wildtype neurons were able to silence more efficiently  
170 the GFP reporter compared to TBPH-minus brains, suggesting that the absence of TBPH  
171 may have affected the normal functioning of the siRNA machinery (Figure 3A). In order

172 to identify the molecular mechanisms behind these alterations, we investigated whether  
173 the expression levels of the different components of the siRNA machinery were affected  
174 by the absence of TBPH in *Drosophila* mutant heads. For these experiments, we utilized  
175 qRT-PCR techniques to test the brain levels of the principal constituents of the RISC  
176 complex like: Dicer-2, loquacious and Argonaute 2. In addition, we analyzed the  
177 expression amounts of a different group of genes previously associated with LTR  
178 silencing such as piwi, pasha, and homeless (Kavi et al., 2005). Interestingly, our study  
179 found that the mRNA levels of RNase Dicer-2 (*Dcr-2*) where the only transcript  
180 significantly downregulated in two independent loss of function alleles of TBPH (Figure  
181 3B and Figure 3-figure supplement 1). Furthermore, we observed that the protein levels  
182 of *Dcr-2* were similarly downregulated in TBPH-minus heads compared to controls  
183 (Figure 3C). In addition, the presence of putative binding sites for TBPH in the coding  
184 sequence of *Dcr-2*, decided us to explore whether these molecules physically interact *in*  
185 *vivo*. For these experiments, we expressed a flag-tagged isoform of TBPH in *Drosophila*  
186 neurons and performed pull down assays from fly heads tissues (Godena et al., 2011;  
187 Romano et al., 2014). In this manner, we found that the mRNA of *Dcr-2* appeared highly  
188 enriched in TBPH immunoprecipitated samples compared to similar experiments  
189 performed utilizing a modified variant of this protein that is unable to bind the RNA  
190 (TBPH<sup>F/L</sup>), (Ayala et al., 2005; Buratti and Baralle, 2001), confirming that these  
191 molecules physically relate *in vivo* (Figure 3D). Additionally, we observed that TBPH  
192 was also capable to bind *Dcr-2* at the protein level demonstrating direct protein-protein  
193 interactions between these molecules in *Drosophila* neurons (Figure 3E). Interestingly,  
194 we found that the suppression of TDP-43 in human neuroblastoma SH-S5Y5 cells  
195 produced a similar reduction in the expression levels of the human protein Dicer  
196 suggesting that these regulatory mechanisms must be conserved among the species  
197 (Figure 3F), (Kawahara and Mieda-Sato, 2012). Altogether, our results stipulate that  
198 TBPH may regulate the proficiency of the siRNA machinery in *Drosophila* neurons by  
199 modulating the expression levels of *Dcr-2* or, alternatively, TBPH could control *Dcr-2*  
200 activity through the formation of RISC complexes using direct physical interactions and  
201 conserved mechanisms.

202

### 203 **The rescue of *Dcr-2* expression levels retrieves retrotransposons silencing and** 204 **recuperates motoneurons degeneration in TBPH-minus flies**

205 The data described above, indicates that endogenous TBPH is physiologically required to  
206 prevent neurodegeneration by blocking the activation of retrotransposons through the  
207 regulation of *Dcr-2* activity in *Drosophila* neurons. In order to test this hypothesis, we  
208 decided to reestablish the expression levels of *Dcr-2* in TBPH-mutant backgrounds. For  
209 these experiments, transgenic flies containing the *Dcr-2* gene cloned under UAS  
210 regulatory sequences (UAS-*Dcr-2*) were crossed against insects carrying the pan-  
211 neuronal driver *elav-GAL4* or the more constrained motoneurons promoter *D42-GAL4*.  
212 Strikingly, we observed that the expression of UAS-*Dcr-2* in neurons or motoneurons  
213 was sufficient to revert the serious locomotive problems showed in of TBPH-null larvae  
214 (*tbph*<sup>Δ23</sup>/*tbph*<sup>Δ23</sup>; *elav-GAL4* or *D42-GAL4/UAS-Dcr-2*) compared to identical flies  
215 expressing the unrelated protein GFP (*tbph*<sup>Δ23</sup>/*tbph*<sup>Δ23</sup>; *elav-GAL4* or *D42-GAL4/UAS-*  
216 *GFP*) (Figure 4A). Moreover, we found that the recovery of the fly locomotion due to  
217 *Dcr-2* expression was followed by the outgrowth of the motoneurons synaptic terminals

218 and the reinnervation of the underlying muscles (Figure 4B and C). These modifications,  
219 were followed by the reorganization of the glutamate receptor clusters at the postsynaptic  
220 membranes (Figure 4D and E). In addition, we detected that the expression of UAS-*Dcr*-  
221 2 was able to revert the overexpression of *gypsy* in TBPH-mutant brains (Figure 4F),  
222 demonstrating that the alterations in *Dcr*-2 levels were responsible for the abnormal  
223 activation of *gypsy* and the neurodegeneration associated with defects in TBPH. In  
224 addition, our results predict that therapeutic interventions aimed to potentiate *Dcr*-2  
225 activity along with the siRNA machinery, would be beneficial to prevent the  
226 neurodegeneration occasioned by alterations in TBPH function. In agreement of this idea,  
227 we observed that TBPH-minus larvae treated with enoxacin (Shan et al., 2008) were able  
228 to recover their locomotive problems and motoneurons synaptic defects revealing that  
229 similar therapeutic strategies could be beneficial in patients with ALS (Figure 4G-J).

230

## 231 **DISCUSSION**

232 The activation of retrotransposons (RTEs) was observed in brain tissues obtained from  
233 patients affected from distinctive neurodegenerative diseases and, alterations in the  
234 regulation of these elements were described in patients carrying familial or sporadic  
235 mutations in TDP-43 suggesting that these events might be related. In agreement with  
236 this hypothesis, the overexpression of human TDP-43 provoked the dysregulation of  
237 RTEs and neurodegeneration in different animal models (Krug et al., 2017; Li et al.,  
238 2013). Yet, these experiments were largely base on the aberrant expression of a  
239 neurotoxic protein, making difficult to determine if the results reported were due to a  
240 toxic gain function effect of TDP-43 or the dominant interference of this protein with  
241 nonspecific mRNA targets and proteins partners. Therefore, remains a matter of debate if  
242 the physiological function TDP-43 is required to maintain the repressed status of RTEs or  
243 whether the activation of RTEs contribute to the neurodegeneration induced by defects in  
244 the function of endogenous TDP-43. In order to find answers to these questions, we  
245 performed a genome wide analysis using DNA microchips hybridized with head tissues  
246 obtained from null alleles of TBPH, the TDP-43 homolog protein *Drosophila*. As a result,  
247 we found a number of RTEs that appeared consistently dysregulated in *tbph*<sup>Δ23</sup> and  
248 *tbph*<sup>Δ142</sup> mutant flies and these positive hits were further confirmed by quantitative RT-  
249 PCR. Interestingly, we observed that one of the most upregulated RTEs was the *gypsy*  
250 and detected that the glycoprotein *env*, codified for this retrotransposon, was also  
251 upregulated in TBPH-mutants heads (Song et al., 1994). The *Drosophila env* protein,  
252 presents strong homology with the human glycoprotein ERV codified by the endogenous  
253 retrovirus-K (HERV-K) and, more interestingly, these viral transcripts were found  
254 accumulated in the CNS of patients with ALS, suggesting that the regulatory mechanisms  
255 behind the activation of these elements might be conserved and present in the physio  
256 pathogenesis of ALS. In addition, we detected that the genetic rescue of the missing  
257 copies of TBPH was able to repress the RTEs activation as well as the accumulation of  
258 the *env* protein in TBPH-null backgrounds demonstrating that these alterations were  
259 specific.

260

### 261 **The activation of RTEs provoke motoneurons degeneration in TBPH-null flies.**

262 Regarding to the biological implications of the results described above, several lines of  
263 investigation have suggested that the mobilization of the RTEs provokes neuronal decline

264 and degeneration (Guo et al., 2018; Krug et al., 2017; Li et al., 2013). On the contrary,  
265 parallel studies have reported that the activation of the retrotransposons drives genomic  
266 heterogeneity and promotes neurogenesis in flies (Bodea Gabriela O. et al., n.d.). Taking  
267 into account these possible scenarios, we found that the suppression of transposons  
268 retrotranscription through the administration of revert transcriptase inhibitors and/or  
269 nucleoside revert transcriptase inhibitors, was able to ameliorate the locomotive problems  
270 described in TBPH-minus flies. More specifically, we observed that the suppression of  
271 *gypsy* in neurons or motoneurons was sufficient to revert locomotive defects, promote  
272 motoneurons terminals growth and prevent muscles denervation in *Drosophila* TBPH-  
273 null mutants. These results, imply TBPH is physiologically required to prevent the  
274 neurotoxic activation of these transposable elements in neurons and, more restrictedly, in  
275 motoneurons. On the contrary, the silencing of *gypsy* in glial cells was not able to rescue  
276 the phenotypes described in TBPH-null flies suggesting that the repression of the  
277 retrotransposon in these tissues is not sufficient to prevent the neurodegeneration induced  
278 by the activation of *gypsy*.

279

### 280 **TBPH prevents RTEs-mediated neurodegeneration via the regulation of *Dcr-2*** 281 **levels.**

282 At the molecular level, we found that the RNA silencing activity of the siRNA machinery  
283 was reduced in TBPH-null neurons. Additionally, we detected that *Dcr-2*, one of the  
284 principal components of the siRNA pathway, was downregulated in TBPH-mutant heads  
285 suggesting that defects in the activity of this endoribonuclease might be responsible for  
286 the alterations in RTEs repression described above. In agreement with these hypotheses,  
287 we observed that the genetic rescue of *Dcr-2* expression was able to prevent the  
288 activation of the *gypsy* as well as rescue motoneurons degeneration in TBPH-loss-of-  
289 function *Drosophila*. Furthermore, we established that TBPH forms molecular complexes  
290 with *Dcr-2* through physically interactions with the mRNA and the protein itself. The  
291 formation of similar protein complexes together with Dicer and Drosha were described  
292 for human TDP-43 (Kawahara and Mieda-Sato, 2012), suggesting that these mechanisms  
293 might be conserve and present in ALS. In agreement with this idea, we found that the  
294 suppression of TDP-43 induce the downregulation of Dicer in human neuroblastoma cell  
295 lines indicating that TDP-43 function is required to prevent defects in Dicer activity.

296

### 297 **Pharmacological treatments aimed to enhance *Dcr-2* activity were able to rescue** 298 **motoneurons degeneration in TBPH-null flies.**

299 Finally, our experiments demonstrated that TBPH physically interacts with *Dcr-2* in  
300 mRNA and the protein complexes signifying that TBPH may act as a regulatory  
301 component of the RNA-induced silencing complexes (RISC) in *Drosophila* neurons. In  
302 consonance with these findings we uncovered that pharmacological treatments utilizing  
303 compounds capable to activates the siRNA pathway like enoxacin, were able to restore  
304 the locomotive behaviors and the formation of neuromuscular synapsis in TBPH-  
305 deficient flies. These therapeutic interventions, either alone or in combination with  
306 NRTIs and NNRTIs, may help to control the progress of the disease in patients with  
307 familial or sporadic ALS.

308

## 309 **MATERIAL AND METHODS**



### 310 **Fly strains and maintenance**

311 All flies were maintained at 25°C, with a 12:12 hour light:dark cycle, on standard  
312 cornmeal food (agar 6.25 g/L, yeast 62.5g/L, sugar 41.6 g/L, flour 29 g/L, propionic acid  
313 4.1ml/L).

314 The genotype of the flies used in this work are indicated below:

315  $w^{1118} - w;tbph^{\Delta 23}/CyO^{GFP} - w;tbph^{\Delta 142}/CyO^{GFP} - w;elav-GAL4/CyO^{GFP} - w;;D42-GAL4 -$   
316  $Repo-GAL4/TM3,Sb - GMR-GAL4/CyO - UAS-Dcr-2 - w;;UAS-EGFP - w;UAS-$   
317  $TBPH - w;;UAS-TBPH^{F/L} - UAS-gypsy-IR$  insertion 3 and 4 (gifted by Professor Peng  
318 Jin) -  $UAS-TBPH-RNAi/TM6b$  (#ID38377, VDRC) -  $UAS-EGFP/TM3,Sb - UAS-GFP-$   
319  $IR$  (#9330 Bloomington).

### 320 **Larval movement**

321 Peristaltic waves of third instar larvae were performed as already described in (Feiguin et  
322 al., 2009). Briefly, larvae, after genotype selection, were rinsed in water and transferred  
323 to a 0.7% agarose dish (94mm diameter) and peristaltic waves were counted for a period  
324 of two minutes. A minimum of 20 animals was analyzed for each genotype to reach a  
325 statistical representative population.

### 326 **Drug treatment of larvae**

327 Parental fly crosses were settled on standard cornmeal added of the below listed drugs  
328 with the reported final concentration: Stavudine 10µM, Azidotimidine 10µM, Tenofovir  
329 10µM, Abacavir (#SML0089 Sigma) 10µM, Rilpivirine (#10410 Sigma) 10µM,  
330 Enoxacin (#AB143281 Abcam) 10µM, Lamivudine (#L1295 Sigma) 10µM. For each  
331 drug a vehicle-only control group was arranged. Parental flies have been maintained 24  
332 hours in the tubes to allow the embryo laying. Synchronized embryos were grown to  
333 obtain third instar larvae to be tested for mobility or to be analyzed NMJ morphology.

### 334 **RNA extraction and microarray analysis**

335 RNA, both from adult dissected brains and adult heads, was extracted with RNeasy  
336 Microarray tissue kit (QIAGEN #73304). Gene expression analysis was performed on  
337 three independent biological replicates by GenoSplice company on the Affimetrix  
338 platform using Gene Chip Drosophila Genome 2.0 Array. RNA extracted from  
339 Drosophila adult heads, 1 day aged and sex-matched, of both wild type and TBPH null  
340 alleles ( $tbph^{\Delta 23}$  and  $tbph^{\Delta 142}$ ) were subjected to quality control tests before chip  
341 hybridization. The min-fold change for both up-regulated and down-regulated genes was  
342 settled to 1.5.

### 343 **Immunohistochemistry, confocal acquisition and quantification**

344 Third instar larvae body were dissected and stained as previously described (Romano et  
345 al., 2014). Larvae were dissected in HL-3, fixed in 4% paraformaldehyde 20 minutes (5  
346 min in methanol for anti-GluRIIA) and subsequently blocked in 5% Normal goat serum  
347 (Vector laboratories #S-1000) in PBS, 0.1% Tween 20. Primary antibody incubations  
348 were performed over night at 4°C, while secondary antibodies were incubated at room  
349 temperature for 2 hrs. Dilutions of the antibodies used are reported below: anti-HRP  
350 (Jackson 1:150), anti-GluRIIA 8B4D2c (DSHB 1:15), Alexa-Fluor® 488 (mouse or  
351 rabbit 1:500) and Alexa- Fluor® 555 (mouse or rabbit 1:500).

352 Stained larvae were mount with Slow fade Gold (#S36936 Thermo Fisher Scientific) and  
353 images of muscles 6 and 7 of the second abdominal segments were gained on a Zeiss  
354 LSM880 Laser scanning microscope (63x oil lens). All acquisitions performed in these  
355 experiments were simultaneously processed using the same microscope settings and

356 subsequently analyzed by ImageJ (Wayne Rasband, NIH) and Prism (GraphPad, USA)  
357 software.

### 358 **Cell culture and RNA interference**

359 SH-SY5Y neuroblastoma cell line was cultured in DMEM-Glutamax (#31966-021,  
360 Thermo Fisher Scientific) supplemented with 10% fetal bovine serum and 1X antibiotic-  
361 antimycotic solution (#A5955; Sigma). For RNA interference  $2-4 \times 10^5$  cells were seeded  
362 in a 60mm plate in 2ml of medium containing 10% fetal serum. Two rounds of silencing,  
363 for a total of 48 hrs silencing, were carried out. HiPerfect Transfection Reagent  
364 (#301705, Qiagen) and Opti-MEM I reduced serum medium (#51985-026, Thermo  
365 Fisher Scientific) were used with a 200nM final concentration of siRNA, (TDP43: 5'-  
366 gcaaagccaagaugagccu-3' and EGFP control: 5'- gcaccauucuucaagga-3'; Sigma).  
367 Silenced cells were collected by trypsinization, lysed in RIPA buffer and immunoblotted.

### 368 **Immunoblot**

369 Drosophila adult heads or brains were homogenized in lysis buffer 1X (10mM Tris,  
370 150mM NaCl, 5mM EDTA, 5mM EGTA, 10% Glycerol, 50mM NaF, 5mM DTT, 4M  
371 Urea, pH 7.4, plus protease inhibitors and protein content quantified with Quant-iT  
372 Protein Assay Kit (#Q33211 Thermo Fisher Scientific). SH-SY5Y cells, were  
373 homogenized in RIPA buffer (NaCl 150mM, NP-40 1%,  
374 Sodium Deoxycholate 0.5%, SDS 0.1%, EDTA 2mM, Tris 50mM, pH8.0) added of  
375 protease inhibitors and protein lysates were quantified by Pierce™ BCA Protein Assay  
376 Kit (#23225, Thermo Fisher Scientific). Lysates were separated on SDS-PAGE and wet-  
377 transferred to nitrocellulose membranes (#NBA083C, Whatman). The primary antibody  
378 used were: anti Env (1:100 gifted by Prof. Christophe Terzian), anti Dcr-2 (1:300  
379 #ab4732, ABCAM), anti h-Dicer (1:3000, #PA5-78446 Thermo Fisher Scientific), anti  
380 hTDP (1:4000, #12892-1-AP, Proteintech), anti GFP (1:3000, #A11122 Thermo Fisher  
381 Scientific), anti-TBPH (1:4000, homemade, (Feiguin et al., 2009), anti-GAPDH (1:1000  
382 #sc-25778, Santa Cruz), anti-Tubulin (1:2000, #CP06, Calbiochem).

### 383 **Immunoprecipitation for protein-protein interaction**

384 Approximately one hundred Drosophila heads for each genotype (GMR-GAL4/UAS-  
385 TBPH and GMR-GAL4/+) were collected by flash freezing and homogenized in  
386 immunoprecipitation buffer (20mM Tris pH7.5, 110mM NaCl, 0.5 % Triton X-100, and  
387 protease inhibitors (Roche #11836170001)) with a Dounce homogenizer. Lysates were  
388 subjected to 0.4g centrifugation for 5 minutes to remove largest debris and protein  
389 content quantified by BCA (#23225, Thermo Fisher Scientific). Equal protein amounts  
390 were added of protein G magnetic beads (#10003D, Thermo Fisher Scientific) coated  
391 with anti FLAG-M2 antibody (#F3165, Sigma). After an overnight incubation on rotator  
392 at 4°C, beads were subjected to washes and finally heated 70°C for 10 minutes in  
393 1XSDS-PAGE loading dye to elute immunoprecipitated proteins that were subsequently  
394 immunoblotted with anti-TBPH and anti-Dicer2.

### 395 **Immunoprecipitation for RNA enrichment**

396 Drosophila heads collected by flash freezing in liquid nitrogen (elav-GAL4/UAS-TBPH  
397 and elav-GAL4/+;UAS-TBPH<sup>FL</sup>/+) were homogenized in immunoprecipitation buffer  
398 (20mM HEPES, 150mM NaCl, 0.5mM EDTA, 10% glycerol, 0.1% Triton X-100, and  
399 1mM DTT plus protease inhibitors (Roche #11836170001)) with a Dounce homogenizer  
400 and the lysate subjected to 0.4g centrifugation for 5 minutes to remove largest debris.  
401 Cleared lysates were added of protein G magnetic beads (#10003D, Thermo Fisher

402 Scientific) coated with anti FLAG-M2 antibody (#F3165, Sigma) and incubated 4°C for  
403 half an hour. After five washes with immunoprecipitation buffer, beads were TRIZOL  
404 (#15596-026, Ambion) treated to extract RNA.

#### 405 **qRT-PCR**

406 RNA was DNase treated with TURBO DNA-free™ Kit (#AM1907, Thermo Fisher  
407 Scientific) and retrotranscribed with Oligo(dT)<sub>20</sub> Primer (#18418020, Thermo Fisher  
408 Scientific) and Superscript III Reverse Transcriptase (#18080-093, Thermo Fisher  
409 Scientific). Real time PCR was performed with Platinum SYBR Green qPCR SuperMIX  
410 UDG (#11733-038, Thermo Fisher Scientific) on a Bio-Rad CFX96 qPCR System.  
411 Below the used primers:  
412

| target   | fw-primer                    | rv-primer                     |
|----------|------------------------------|-------------------------------|
| RpL11    | 5'-CCATCGGTATCTATGGTCTGGA-3' | 5'-CATCGTATTTCTGCTGGAACCA-3'  |
| Dcr-2    | 5'-GCTTTTATGTGGGTGAACAGGG-3' | 5'-GGCTGTGCCAACAAGAACTT-3'    |
| Syn      | 5'-TGTCACGCAGGGCATCATC-3'    | 5'-GCCGTCTGCACATAGTCCATAG-3'  |
| Accord   | 5'-GGCCTCTTAGGCATGGATCT-3'   | 5'-AGTGAAGCCTTACCTTGCT-3'     |
| Gypsy    | 5'-GGCTCCACCGAAATCAAACA-3'   | 5'-GGCCTGTGTTAACAGGTCCA-3'    |
| Homeless | 5'-TGATCGGCACCGACTATGTCA-3'  | 5'-CTTGGCGTAGATGGACAAGTT-3'   |
| Ago2     | 5'-GCTGGGCGATAGGCCATTTT-3'   | 5'-GGAGGCGTGTAACCACATTA-3'    |
| Loq      | 5'-GGCGGATCGGGCTTACAAG-3'    | 5'-CGTTTCGCTGACGAACCTTAAGG-3' |
| Piwi     | 5'-GTGCGCTCAGATCCCAAAC-3'    | 5'-AAGGCTACGGTCTTGGTTCG-3'    |
| Pasha    | 5'-TGATGGTGACGGCGAAGAATA-3'  | 5'-ATCCCTCGGGTAGGACTTCAA-3'   |

413

#### 414 **Statistical analysis**

415 All statistical analysis was performed with Prism (GraphPad, USA) version 6.0. One way  
416 Anova with Bonferroni correction was applied as statistical test. In all figures all the  
417 values were displayed as the mean and the standard error of the mean (SEM). Statistical  
418 significance was displayed as \*p<0.05, \*\*p<0.01, \*\*\*p<0.001.  
419

#### 420 **ACKNOWLEDGEMENTS**

421 We thank professor Christophe Terzian, Dr. Franck Touret and Dr. Barbara Viginier to  
422 provide us anti-ENV polyclonal antibody and professor Peng Jin to provide us gypsy  
423 transgenic flies. The Bloomington Stock Center and Developmental Studies Hybridoma  
424 Bank for stocks and reagents.  
425

426 *Conflict of Interest statement:* The authors declare none conflict of interest.  
427

#### 428 **FUNDING**

429 The present work was supported by ARISLA (CHRONOS) and BENEFICENTIA  
430 Stiftung.  
431

#### 432 **REFERENCES**

433 Arai T, Hasegawa M, Akiyama H, Ikeda K, Nonaka T, Mori H, Mann D, Tsuchiya K,  
434 Yoshida M, Hashizume Y, Oda T. 2006. TDP-43 is a component of ubiquitin-  
435 positive tau-negative inclusions in frontotemporal lobar degeneration and  
436 amyotrophic lateral sclerosis. *Biochem Biophys Res Commun* **351**:602–611.  
437 doi:10.1016/j.bbrc.2006.10.093

- 438 Ayala YM, Pantano S, D'Ambrogio A, Buratti E, Brindisi A, Marchetti C, Romano M,  
439 Baralle FE. 2005. Human, Drosophila, and C.elegans TDP43: nucleic acid  
440 binding properties and splicing regulatory function. *J Mol Biol* **348**:575–588.  
441 doi:10.1016/j.jmb.2005.02.038
- 442 Bodea Gabriela O., McKelvey Eleanor G. Z., Faulkner Geoffrey J. n.d. Retrotransposon-  
443 induced mosaicism in the neural genome. *Open Biol* **8**:180074.  
444 doi:10.1098/rsob.180074
- 445 Buratti E, Baralle FE. 2001. Characterization and functional implications of the RNA  
446 binding properties of nuclear factor TDP-43, a novel splicing regulator of CFTR  
447 exon 9. *J Biol Chem* **276**:36337–36343. doi:10.1074/jbc.M104236200
- 448 Cannon A, Yang B, Knight J, Farnham IM, Zhang Y, Wuertzer CA, D'Alton S, Lin W,  
449 Castanedes-Casey M, Rousseau L, Scott B, Jurasic M, Howard J, Yu X, Bailey R,  
450 Sarkisian MR, Dickson DW, Petrucelli L, Lewis J. 2012. Neuronal sensitivity to  
451 TDP-43 overexpression is dependent on timing of induction. *Acta Neuropathol*  
452 (*Berl*) **123**:807–823. doi:10.1007/s00401-012-0979-3
- 453 Carthew RW, Sontheimer EJ. 2009. Origins and Mechanisms of miRNAs and siRNAs.  
454 *Cell* **136**:642–655. doi:10.1016/j.cell.2009.01.035
- 455 Douville RN, Nath A. 2017. Human Endogenous Retrovirus-K and TDP-43 Expression  
456 Bridges ALS and HIV Neuropathology. *Front Microbiol* **8**.  
457 doi:10.3389/fmicb.2017.01986
- 458 Feiguin F, Godena VK, Romano G, D'Ambrogio A, Klima R, Baralle FE. 2009.  
459 Depletion of TDP-43 affects Drosophila motoneurons terminal synapsis and  
460 locomotive behavior. *FEBS Lett* **583**:1586–1592.  
461 doi:10.1016/j.febslet.2009.04.019
- 462 Geser F, Martinez-Lage M, Kwong LK, Lee VM-Y, Trojanowski JQ. 2009. Amyotrophic  
463 lateral sclerosis, frontotemporal dementia and beyond: the TDP-43 diseases. *J*  
464 *Neurol* **256**:1205–1214. doi:10.1007/s00415-009-5069-7
- 465 Godena VK, Romano G, Romano M, Appocher C, Klima R, Buratti E, Baralle FE,  
466 Feiguin F. 2011. TDP-43 Regulates Drosophila Neuromuscular Junctions Growth  
467 by Modulating Futsch/MAP1B Levels and Synaptic Microtubules Organization.  
468 *PLOS ONE* **6**:e17808. doi:10.1371/journal.pone.0017808
- 469 Guo C, Jeong H-H, Hsieh Y-C, Klein H-U, Bennett DA, De Jager PL, Liu Z, Shulman  
470 JM. 2018. Tau Activates Transposable Elements in Alzheimer's Disease. *Cell Rep*  
471 **23**:2874–2880. doi:10.1016/j.celrep.2018.05.004
- 472 Igaz LM, Kwong LK, Lee EB, Chen-Plotkin A, Swanson E, Unger T, Malunda J, Xu Y,  
473 Winton MJ, Trojanowski JQ, Lee VM-Y. 2011. Dysregulation of the ALS-  
474 associated gene TDP-43 leads to neuronal death and degeneration in mice. *J Clin*  
475 *Invest* **121**:726–738. doi:10.1172/JCI44867
- 476 Ito H, Kakutani T. 2014. Control of transposable elements in Arabidopsis thaliana.  
477 *Chromosome Res Int J Mol Supramol Evol Asp Chromosome Biol* **22**:217–223.  
478 doi:10.1007/s10577-014-9417-9
- 479 Janssens J, Wils H, Kleinberger G, Joris G, Cuijt I, Ceuterick-de Groote C, Van  
480 Broeckhoven C, Kumar-Singh S. 2013. Overexpression of ALS-Associated  
481 p.M337V Human TDP-43 in Mice Worsens Disease Features Compared to Wild-  
482 type Human TDP-43 Mice. *Mol Neurobiol* **48**:22–35. doi:10.1007/s12035-013-  
483 8427-5

- 484 Kavi HH, Fernandez HR, Xie W, Birchler JA. 2005. RNA silencing in *Drosophila*. *FEBS*  
485 *Lett*, RNAi: Mechanisms, Biology and Applications **579**:5940–5949.  
486 doi:10.1016/j.febslet.2005.08.069
- 487 Kawahara Y, Mieda-Sato A. 2012. TDP-43 promotes microRNA biogenesis as a  
488 component of the Drosha and Dicer complexes. *Proc Natl Acad Sci U S A*  
489 **109**:3347–3352. doi:10.1073/pnas.1112427109
- 490 Krug L, Chatterjee N, Borges-Monroy R, Hearn S, Liao W-W, Morrill K, Prazak L,  
491 Rozhkov N, Theodorou D, Hammell M, Dubnau J. 2017. Retrotransposon  
492 activation contributes to neurodegeneration in a *Drosophila* TDP-43 model of  
493 ALS. *PLoS Genet* **13**:e1006635. doi:10.1371/journal.pgen.1006635
- 494 Li W, Jin Y, Prazak L, Hammell M, Dubnau J. 2012. Transposable Elements in TDP-43-  
495 Mediated Neurodegenerative Disorders. *PLOS ONE* **7**:e44099.  
496 doi:10.1371/journal.pone.0044099
- 497 Li W, Lee M-H, Henderson L, Tyagi R, Bachani M, Steiner J, Campanac E, Hoffman  
498 DA, von Geldern G, Johnson K, Maric D, Morris HD, Lentz M, Pak K, Mammen  
499 A, Ostrow L, Rothstein J, Nath A. 2015. Human endogenous retrovirus-K  
500 contributes to motor neuron disease. *Sci Transl Med* **7**:307ra153.  
501 doi:10.1126/scitranslmed.aac8201
- 502 Li W, Prazak L, Chatterjee N, Grüniger S, Krug L, Theodorou D, Dubnau J. 2013.  
503 Activation of transposable elements during aging and neuronal decline in  
504 *Drosophila*. *Nat Neurosci* **16**:529–531. doi:10.1038/nn.3368
- 505 McCullers TJ, Steiniger M. 2017. Transposable elements in *Drosophila*. *Mob Genet Elem*  
506 **7**:1–18. doi:10.1080/2159256X.2017.1318201
- 507 Misseri Y, Cerutti M, Devauchelle G, Bucheton A, Terzian C. 2004. Analysis of the  
508 *Drosophila* gypsy endogenous retrovirus envelope glycoprotein. *J Gen Virol*  
509 **85**:3325–3331. doi:10.1099/vir.0.79911-0
- 510 Neumann M, Sampathu DM, Kwong LK, Truax AC, Micsenyi MC, Chou TT, Bruce J,  
511 Schuck T, Grossman M, Clark CM, McCluskey LF, Miller BL, Masliah E,  
512 Mackenzie IR, Feldman H, Feiden W, Kretzschmar HA, Trojanowski JQ, Lee  
513 VM-Y. 2006. Ubiquitinated TDP-43 in frontotemporal lobar degeneration and  
514 amyotrophic lateral sclerosis. *Science* **314**:130–133. doi:10.1126/science.1134108
- 515 Romano G, Appocher C, Scorzeto M, Klima R, Baralle FE, Megighian A, Feiguin F.  
516 2015. Glial TDP-43 regulates axon wrapping, GluRIIA clustering and fly motility  
517 by autonomous and non-autonomous mechanisms. *Hum Mol Genet* **24**:6134–  
518 6145. doi:10.1093/hmg/ddv330
- 519 Romano G, Klima R, Buratti E, Verstreken P, Baralle FE, Feiguin F. 2014. Chronological  
520 requirements of TDP-43 function in synaptic organization and locomotive control.  
521 *Neurobiol Dis*. doi:10.1016/j.nbd.2014.07.007
- 522 Shan G, Li Y, Zhang J, Li W, Szulwach KE, Duan R, Faghihi MA, Khalil AM, Lu L,  
523 Paroo Z, Chan AWS, Shi Z, Liu Q, Wahlestedt C, He C, Jin P. 2008. A small  
524 molecule enhances RNA interference and promotes microRNA processing. *Nat*  
525 *Biotechnol* **26**:933–940. doi:10.1038/nbt.1481
- 526 Shan X, Chiang P-M, Price DL, Wong PC. 2010. Altered distributions of Gemini of  
527 coiled bodies and mitochondria in motor neurons of TDP-43 transgenic mice.  
528 *Proc Natl Acad Sci U S A* **107**:16325–16330. doi:10.1073/pnas.1003459107

- 529 Slotkin RK, Martienssen R. 2007. Transposable elements and the epigenetic regulation of  
530 the genome. *Nat Rev Genet* **8**:272–285. doi:10.1038/nrg2072
- 531 Song SU, Gerasimova T, Kurkulos M, Boeke JD, Corces VG. 1994. An env-like protein  
532 encoded by a Drosophila retroelement: evidence that gypsy is an infectious  
533 retrovirus. *Genes Dev* **8**:2046–2057.
- 534 Sreedharan J, Blair IP, Tripathi VB, Hu X, Vance C, Rogelj B, Ackerley S, Durnall JC,  
535 Williams KL, Buratti E, Baralle F, de Belleruche J, Mitchell JD, Leigh PN, Al-  
536 Chalabi A, Miller CC, Nicholson G, Shaw CE. 2008. TDP-43 mutations in  
537 familial and sporadic amyotrophic lateral sclerosis. *Science* **319**:1668–1672.  
538 doi:10.1126/science.1154584
- 539 Stallings NR, Puttaparthi K, Luther CM, Burns DK, Elliott JL. 2010. Progressive motor  
540 weakness in transgenic mice expressing human TDP-43. *Neurobiol Dis* **40**:404–  
541 414. doi:10.1016/j.nbd.2010.06.017
- 542 Swarup V, Phaneuf D, Dupré N, Petri S, Strong M, Kriz J, Julien J-P. 2011. Deregulation  
543 of TDP-43 in amyotrophic lateral sclerosis triggers nuclear factor  $\kappa$ B-mediated  
544 pathogenic pathways. *J Exp Med* **208**:2429–2447. doi:10.1084/jem.20111313
- 545 Tabach Y, Billi AC, Hayes GD, Newman MA, Zuk O, Gabel H, Kamath R, Yacoby K,  
546 Chapman B, Garcia SM, Borowsky M, Kim JK, Ruvkun G. 2013. Identification  
547 of small RNA pathway genes using patterns of phylogenetic conservation and  
548 divergence. *Nature* **493**:694–698. doi:10.1038/nature11779
- 549 Tang W, Samuels V, Whitley N, Bloom N, DeLaGarza T, Newton RJ. 2004. Post-  
550 transcriptional Gene Silencing Induced by Short Interfering RNAs in Cultured  
551 Transgenic Plant Cells. *Genomics Proteomics Bioinformatics* **2**:97–108.  
552 doi:10.1016/S1672-0229(04)02015-7
- 553 Teyssset L, Burns JC, Shike H, Sullivan BL, Bucheton A, Terzian C. 1998. A Moloney  
554 Murine Leukemia Virus-Based Retroviral Vector Pseudotyped by the Insect  
555 Retroviral gypsy Envelope Can Infect Drosophila Cells. *J Virol* **72**:853–856.
- 556 Tian T, Huang C, Tong J, Yang M, Zhou H, Xia X-G. 2011. TDP-43 potentiates alpha-  
557 synuclein toxicity to dopaminergic neurons in transgenic mice. *Int J Biol Sci*  
558 **7**:234–243.
- 559 Touret F, Guiguen F, Greenland T, Terzian C. 2014. In between: Gypsy in Drosophila  
560 melanogaster Reveals New Insights into Endogenous Retrovirus Evolution.  
561 *Viruses* **6**:4914–4925. doi:10.3390/v6124914
- 562 Tsai K-J, Yang C-H, Fang Y-H, Cho K-H, Chien W-L, Wang W-T, Wu T-W, Lin C-P,  
563 Fu W-M, Shen C-KJ. 2010. Elevated expression of TDP-43 in the forebrain of  
564 mice is sufficient to cause neurological and pathological phenotypes mimicking  
565 FTL-D. *J Exp Med* **207**:1661–1673. doi:10.1084/jem.20092164
- 566 Usach I, Melis V, Peris J-E. 2013. Non-nucleoside reverse transcriptase inhibitors: a  
567 review on pharmacokinetics, pharmacodynamics, safety and tolerability. *J Int*  
568 *AIDS Soc* **16**. doi:10.7448/IAS.16.1.18567
- 569 Wegorzewska I, Bell S, Cairns NJ, Miller TM, Baloh RH. 2009. TDP-43 mutant  
570 transgenic mice develop features of ALS and frontotemporal lobar degeneration.  
571 *Proc Natl Acad Sci U S A* **106**:18809–18814. doi:10.1073/pnas.0908767106
- 572 Wils H, Kleinberger G, Janssens J, Pereson S, Joris G, Cuijt I, Smits V, Ceuterick-de  
573 Groote C, Van Broeckhoven C, Kumar-Singh S. 2010. TDP-43 transgenic mice  
574 develop spastic paralysis and neuronal inclusions characteristic of ALS and

575 frontotemporal lobar degeneration. *Proc Natl Acad Sci U S A* **107**:3858–3863.  
576 doi:10.1073/pnas.0912417107  
577 Xu Y-F, Gendron TF, Zhang Y-J, Lin W-L, D’Alton S, Sheng H, Casey MC, Tong J,  
578 Knight J, Yu X, Rademakers R, Boylan K, Hutton M, McGowan E, Dickson DW,  
579 Lewis J, Petrucelli L. 2010. Wild-type human TDP-43 expression causes TDP-43  
580 phosphorylation, mitochondrial aggregation, motor deficits, and early mortality in  
581 transgenic mice. *J Neurosci Off J Soc Neurosci* **30**:10851–10859.  
582 doi:10.1523/JNEUROSCI.1630-10.2010  
583 Xu Y-F, Zhang Y-J, Lin W-L, Cao X, Stetler C, Dickson DW, Lewis J, Petrucelli L.  
584 2011. Expression of mutant TDP-43 induces neuronal dysfunction in transgenic  
585 mice. *Mol Neurodegener* **6**:73. doi:10.1186/1750-1326-6-73  
586  
587

## 588 FIGURES LEGEND

589 **Figure 1.** RTEs are upregulated in TBPH mutants. (A) Microarray results showing  
590 upregulated TEs in TBPH-null mutants: the fold changes are reported for both *tbph*  
591 mutant alleles ( $\Delta 23$  and  $\Delta 142$ ) and referred to  $w^{1118}$ ; TEs family and class were also  
592 indicated.  $n=3$  (biological replicates). (B) Real time quantitative PCR reveals *accord* and  
593 *gypsy* transcript levels normalized on *Rpl11* (housekeeping) in  $w^{1118}$  - *tbph* $\Delta 23$ , *elav*-  
594 *GAL4/tbph* $\Delta 23$ ; UAS-GFP/+ and *tbph* $\Delta 23$ , *elav-GAL4/tbph* $\Delta 23$ , UAS-TBPH.  $n=3$  (biological  
595 replicates, with 3 technical replicates for each), error bars SEM. (C) Western blot  
596 analysis of *Drosophila env* levels in  $\Delta tb$ -*gypsy-IR* (*tbph* $\Delta 23$ , *elav-GAL4/tbph* $\Delta 23$ ; UAS-  
597 *gypsy-IR/+*), ctrl (*tbph* $\Delta 23$ , *elav-GAL4/+*),  $\Delta tb$ -GFP-IR (*tbph* $\Delta 23$ , *elav-GAL4/tbph* $\Delta 23$ ;  
598 UAS-GFP-IR/+ and  $\Delta tb$ -TBPH (*tbph* $\Delta 23$ , *elav-GAL4/tbph* $\Delta 23$ , UAS-TBPH). Adult brains,  
599 1 day old, were probed with anti-ENV and alpha-tubulin antibodies. The same membrane  
600 was probed with the two antibodies and the bands of interest were cropped.  
601 Quantification of normalized amounts was reported below each lane.  $n=2$  (biological  
602 replicates).

603 **Figure 2.** Pharmacological and genetic suppression of RTEs revert TBPH mutant  
604 phenotypes. (A) Number of peristaltic waves of Ctrl ( $w^{1118}$ ) and  $\Delta tb$  (*tbph* $\Delta 23$ / *tbph* $\Delta 23$ ) fed  
605 with NRTIs drugs (D) compared to vehicle only (V).  $n=20$ . (B) Number of peristaltic  
606 waves of Ctrl ( $w^{1118}$ ) and  $\Delta tb$  (*tbph* $\Delta 23$ / *tbph* $\Delta 23$ ) fed with NNRTIs drugs (D) compared to  
607 vehicle only (V).  $n=20$ . (C) Number of peristaltic waves of Ctrl ( $w^{1118}$ ),  $\Delta tb$ -GFP-IR  
608 (*tbph* $\Delta 23$ , *elav-GAL4/tbph* $\Delta 23$ ; UAS-GFP-IR/+),  $\Delta tb$ -*gypsy-IR*<sub>3</sub> (*tbph* $\Delta 23$ , *elav*-  
609 *GAL4/tbph* $\Delta 23$ ; UAS-*gypsy-IR*<sub>3</sub>/+) and  $\Delta tb$ -*gypsy-IR*<sub>4</sub> (*tbph* $\Delta 23$ , *elav-GAL4/tbph* $\Delta 23$ ; UAS-  
610 *gypsy-IR*<sub>4</sub>/+).  $n=20$ . (D) Confocal images of third instar NMJ terminals in muscle 6/7  
611 second segment stained with anti-HRP (in green) in Ctrl,  $\Delta tb$ -GFP-IR and  $\Delta tb$ -*gypsy-IR*<sub>3</sub>.  
612 (E) Quantification of branches number.  $n=15$ . (F) Confocal images of third instar NMJ  
613 terminals in muscle 6/7 second segment stained with anti-HRP (in green) and anti-  
614 GluRIIA (in magenta) in Ctrl,  $\Delta tb$ -GFP-IR and  $\Delta tb$ -*gypsy-IR*<sub>3</sub>. (G) Quantification of  
615 GluRIIA intensity.  $n>200$  boutons. \* $p<0.05$ , \*\* $p<0.01$ , \*\*\* $p<0.001$  calculated by one-  
616 way ANOVA, error bars SEM. Scale bar 10 $\mu$ m (in D) and 5 $\mu$ m (in F).

617 **Figure 3.** TBPH physically interacts and influences *Dcr-2* levels. (A) Western blot  
618 analysis of lane 1 (+/+;D42-GAL4,UAS-EGFP/+), lane 2 (+/+;D42-GAL4,UAS-  
619 EGFP/UAS-GFP-IR), lane 3 (*tbph* $\Delta 23$ /*tbph* $\Delta 23$ ; D42-GAL4,UAS-EGFP/+) and lane 4  
620 (*tbph* $\Delta 23$ /*tbph* $\Delta 23$ ; D42-GAL4,UAS-EGFP/UAS-GFP-IR). Adult brains, 1 day old, were

621 probed with anti-GFP and alpha-tubulin antibodies. The same membrane was probe with  
622 the two antibodies and the bands of interest were cropped. Quantification of normalized  
623 amounts was reported below each lane.  $n=2$  (biological replicates). **(B)** Real time PCR of  
624 *Dcr-2* transcript levels normalized on *Rpl11* (housekeeping) in adult heads of  $w^{1118}$  and  
625  $tbph^{\Delta 23}/tbph^{\Delta 23}$ .  $n=3$  (biological replicates, with 2 technical replicates for each), error bars  
626 SEM. **(C)** Western blot analysis of  $w^{1118}$  and  $tbph^{\Delta 23}/tbph^{\Delta 23}$  adult brains probed with  
627 anti-Dicer and alpha-tubulin antibodies. The same membrane was probe with the two  
628 antibodies and the bands of interest were cropped. Quantification of normalized amounts  
629 was reported below each lane.  $n=3$  (biological replicates). **(D)** qRT-PCR analysis of  
630 mRNAs immunoprecipitated by Flag-tagged TBPH (Elav>TBPH) and its mutant variants  
631 TBPH<sup>F/L</sup> (Elav> TBPH<sup>F/L</sup>). The *dicer-2* enrichment-folds was referred to *rpl-11*  
632 (negative control), syntaxin has been used as positive control.  $n=3$  (biological replicates).  
633 **(E)** Western blot analysis of proteins immunoprecipitated by Flag-tagged TBPH in adult  
634 heads of TBPH (GMR-GAL4/UAS-TBPH) and + (GMR-GAL4/+). Input, depleted and  
635 immunoprecipitated materials (IP) were analyzed, probing the membrane with anti-TBPH  
636 and Dicer.  $n=2$  (biological replicates). **(F)** Western blot analysis on human neuroblastoma  
637 (SH-S5Y5) cell line probed for anti-Dicer, anti-GAPDH and anti-TDP-43 in siGFP (GFP  
638 ctrl) and siTDP-43 (TDP-43 silenced). The same membrane was probe with the three  
639 antibodies and the bands of interest were cropped. Quantification of normalized protein  
640 amount was reported below each lane,  $n=3$  (biological replicates).

641 **Figure 4.** Genetic rescue of *Dcr-2* expression recovers TBPH mutant pathological  
642 phenotypes. **(A)** Number of peristaltic waves of Ctrl ( $w^{1118}$ ),  $\Delta tb$ -driver>GFP  
643 ( $tbph^{\Delta 23}/tbph^{\Delta 23}$ ;driver-GAL4/UAS-GFP) and  $\Delta tb$ -driver>Dcr-2 (UAS-Dcr-  
644 2/+;  $tbph^{\Delta 23}/tbph^{\Delta 23}$ ;driver-GAL4/+). Elav-GAL4, D42-GAL4 and Repo-GAL4 were used  
645 as reported on the figure.  $n=20$ . **(B)** Confocal images of third instar NMJ terminals in  
646 muscle 6/7 second segment stained with anti-HRP (in green) in Ctrl,  $\Delta tb$ -driver>GFP and  
647  $\Delta tb$ -driver>Dcr-2, using elav-GAL4. **(C)** Quantification of branches number.  $n=15$ . **(D)**  
648 Confocal images of third instar NMJ terminals in muscle 6/7 second segment stained  
649 with anti-HRP (in green) and anti-GluRIIA (in magenta) in Ctrl,  $\Delta tb$ -driver>GFP and  
650  $\Delta tb$ -driver>Dcr-2, using elav-GAL4. **(E)** Quantification of GluRIIA intensity.  $n>200$   
651 boutons. **(F)** Real time PCR of *gypsy* transcript levels normalized on *Rpl11*  
652 (housekeeping) in Ctrl,  $\Delta tb$ -driver>GFP and  $\Delta tb$ -driver>Dcr-2, using elav-GAL4.  $n=2$ ,  
653 error bars SEM. **(G)** Number of peristaltic waves of GFPi (Dcr-2/+;  $tbph^{\Delta 23}$ ,elav-  
654 GAL4/+;UAS-GFP-IR/+) and TBi (Dcr-2/+;  $tbph^{\Delta 23}$ ,elav-GAL4/+;UAS-TBPH-IR/+) fed  
655 with 10  $\mu$ M Enoxacin (D) compared to vehicle only (V).  $n=20$ . **(H)** Confocal images of  
656 third instar NMJ terminals in muscle 6/7 second segment stained with anti-HRP (in  
657 green) and anti-GluRIIA (in magenta) in GFPi and TBi. **(J)** Quantification of GluRIIA  
658 intensity.  $n>200$  boutons. \*\* $p<0.01$ , \*\*\* $p<0.001$  calculated by one-way ANOVA, error  
659 bars SEM. Scale bar 10 $\mu$ m (in B) and 5 $\mu$ m (in D and H).

660  
661



## Figure 1

**A**

| <i>TEs upregulated</i> | <i>tbph</i> <sup>Δ23/-</sup><br>(folds) | <i>tbph</i> <sup>Δ142/-</sup><br>(folds) | Family           | Class     |
|------------------------|-----------------------------------------|------------------------------------------|------------------|-----------|
| Transposon.54          | 32.54                                   | 29.52                                    | <i>accord</i>    | LTR       |
| Transposon.17          | 10.06                                   | 15.97                                    | <i>gypsy</i>     | LTR       |
| Transposon.35          | 2.4                                     | 1.75                                     | <i>blastopia</i> | LTR       |
| Transposon.32          | 1.96                                    | 1.66                                     | <i>springer</i>  | LINE-like |
| Transposon.10          | 1.9                                     | 1.66                                     | <i>burdock</i>   | LTR       |

**B**

qRT-PCR – Adult brains

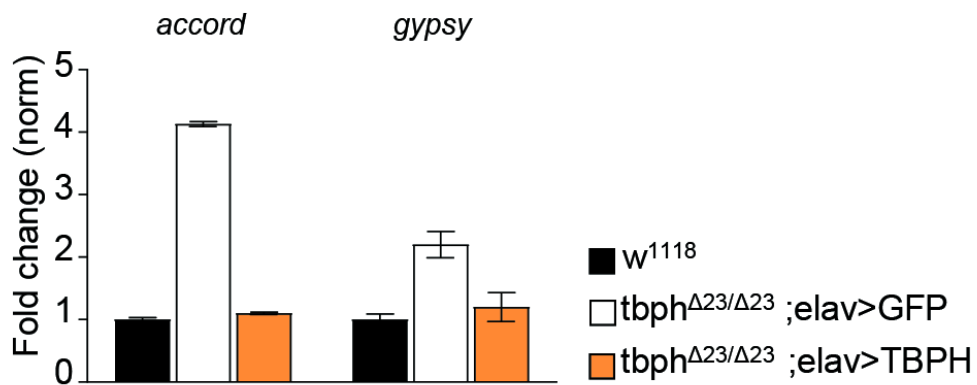

**C**

WB - Adult brains

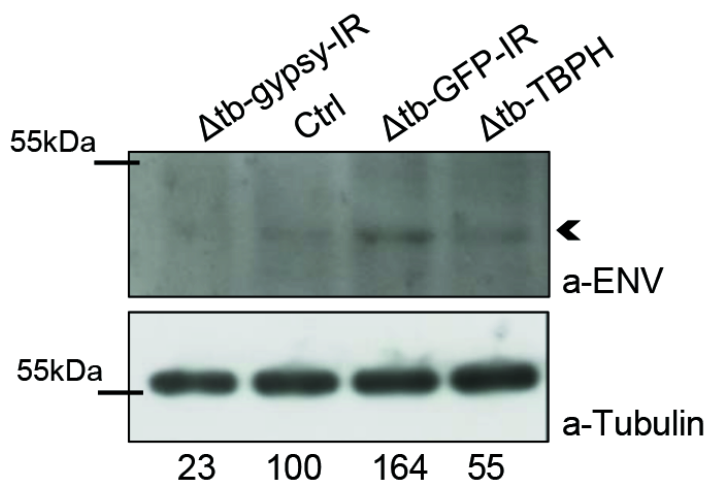

**Figure 2**

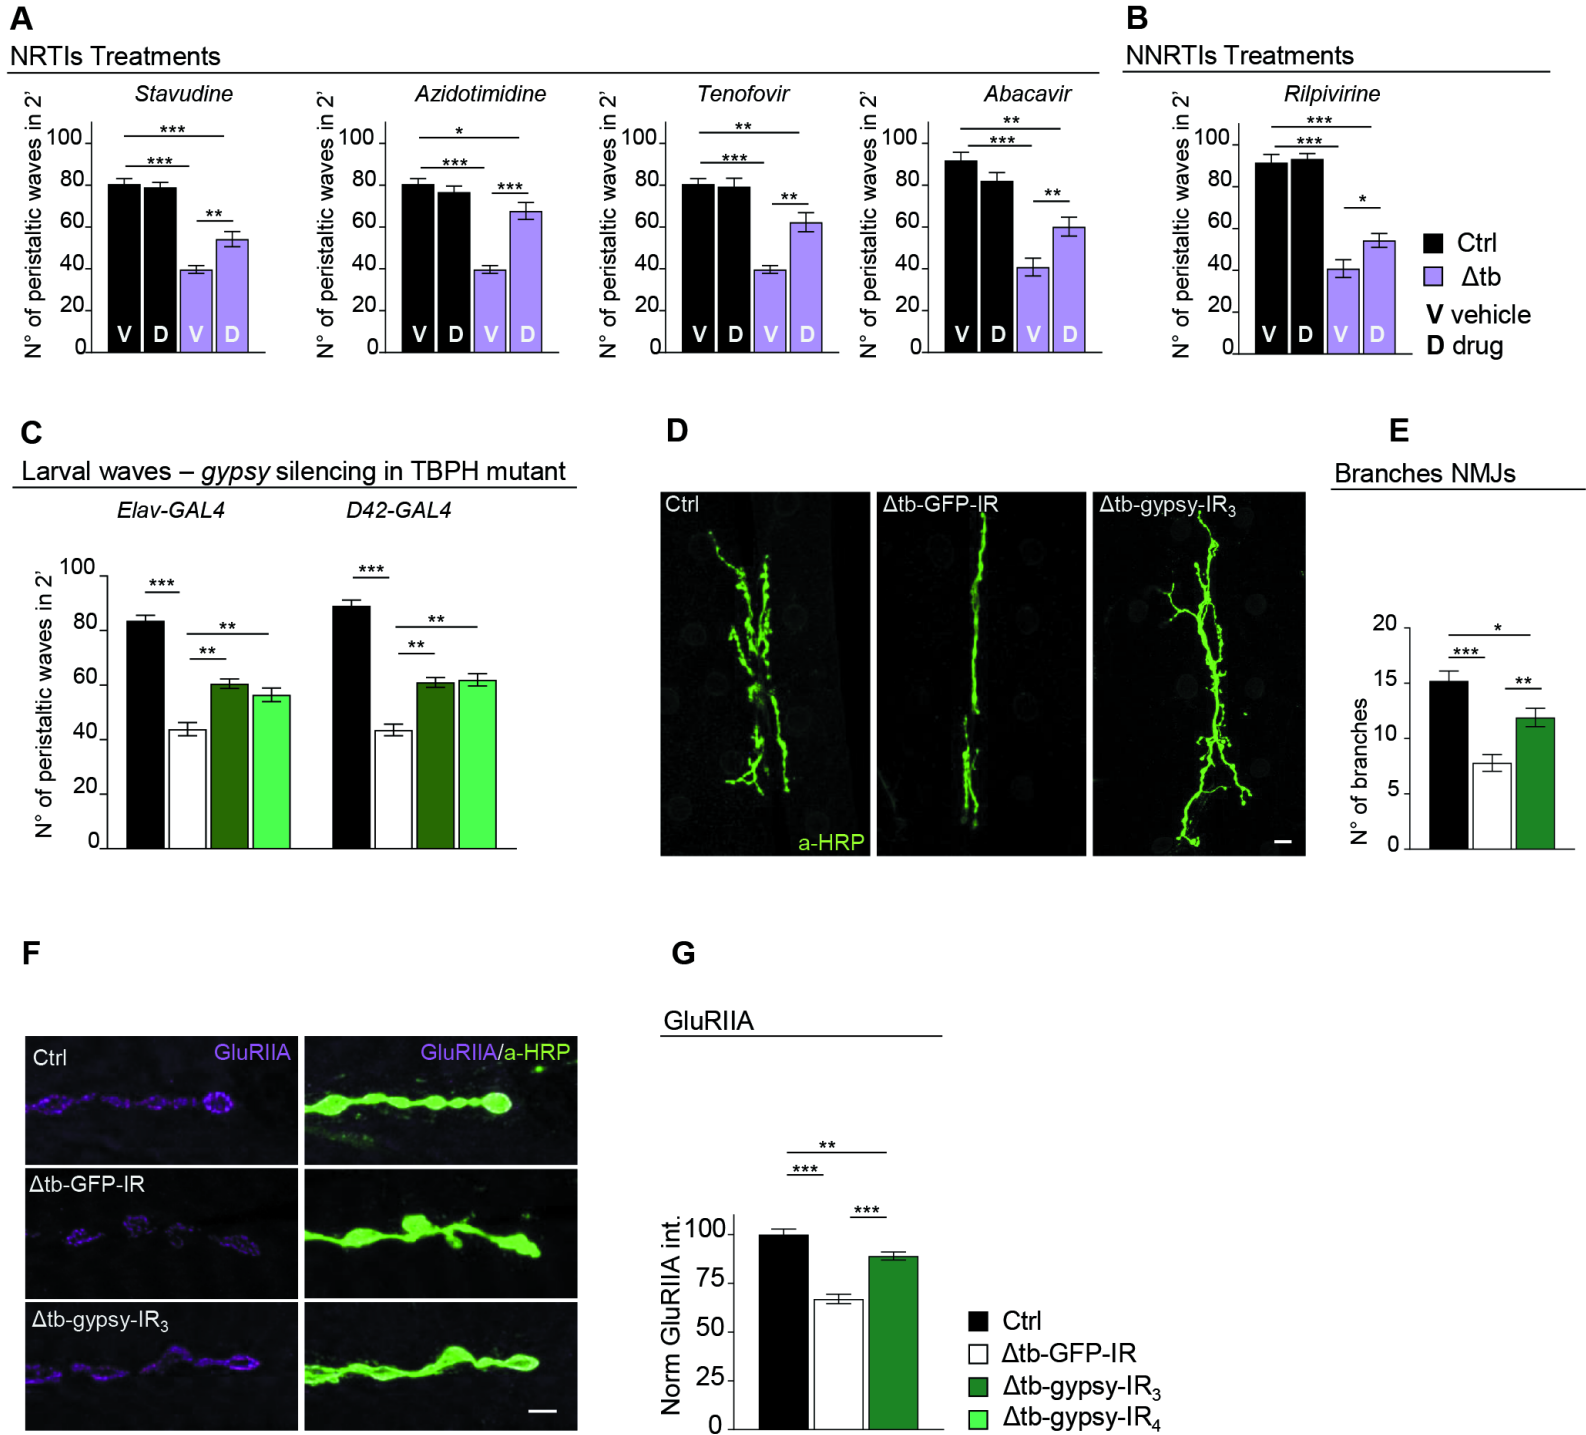

## Figure 3

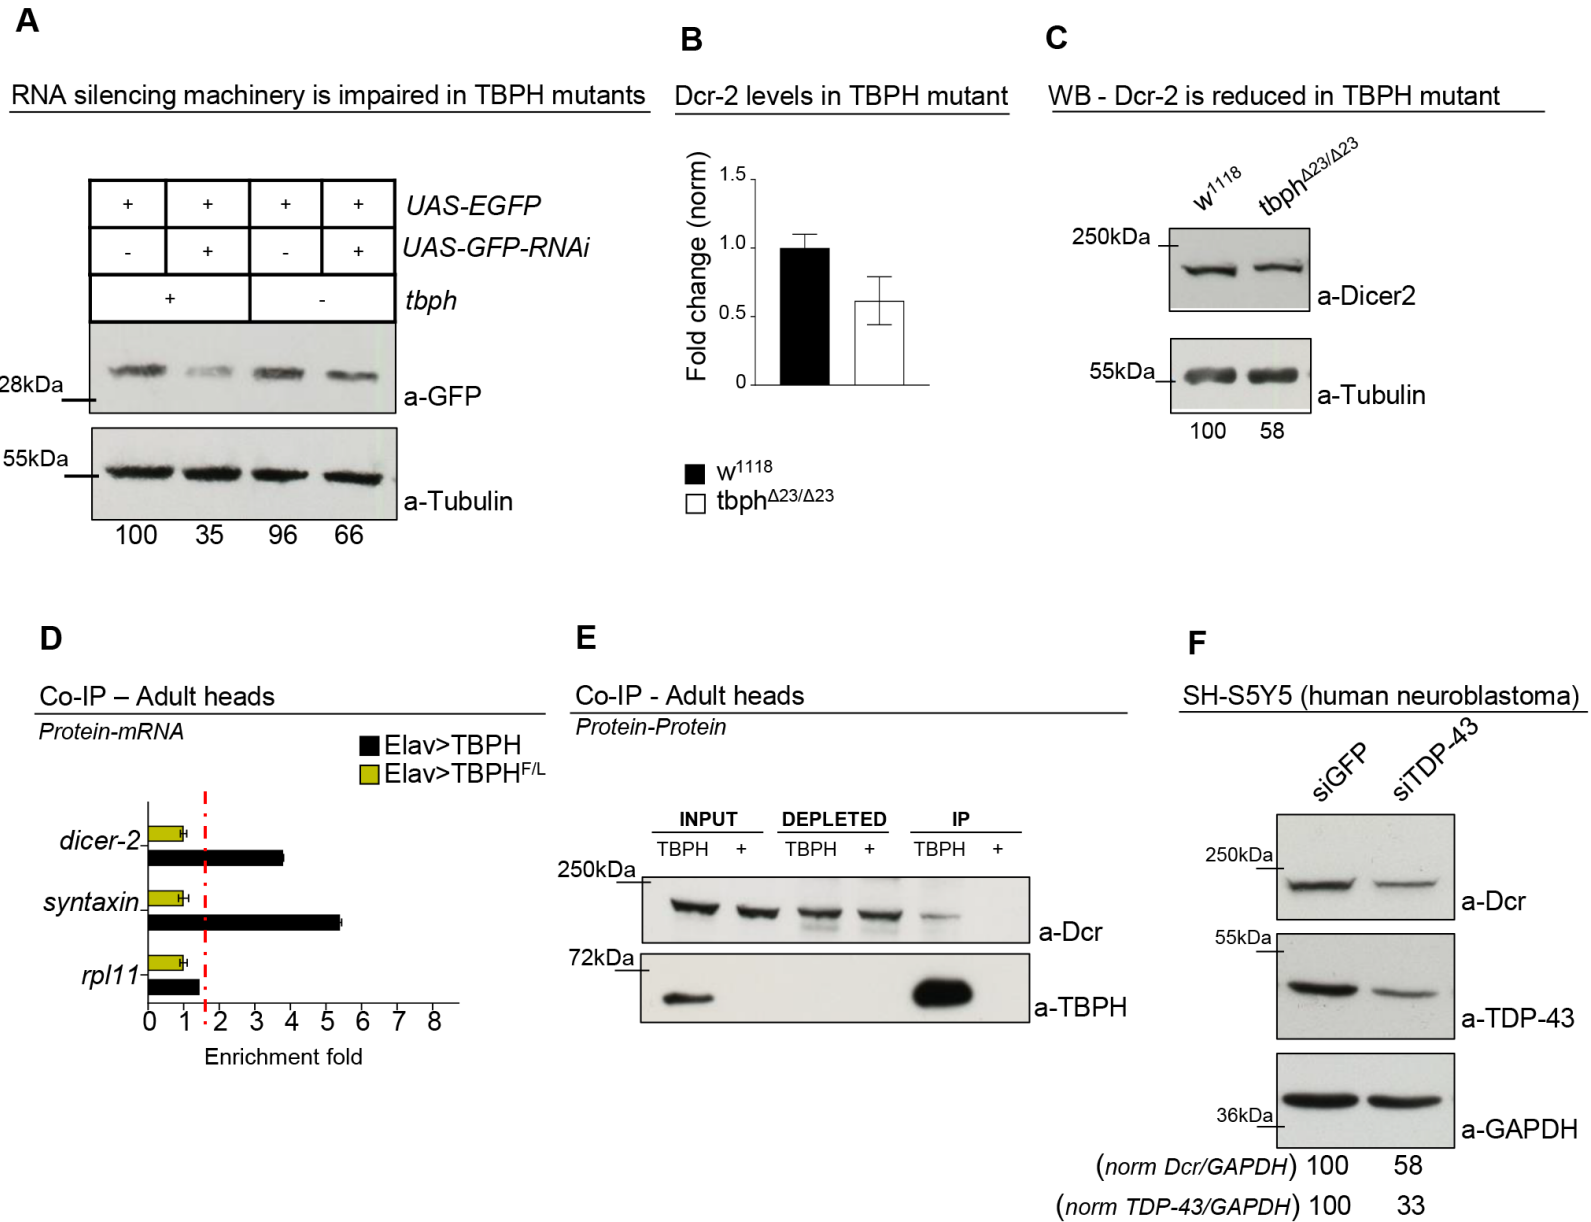

## Figure 4

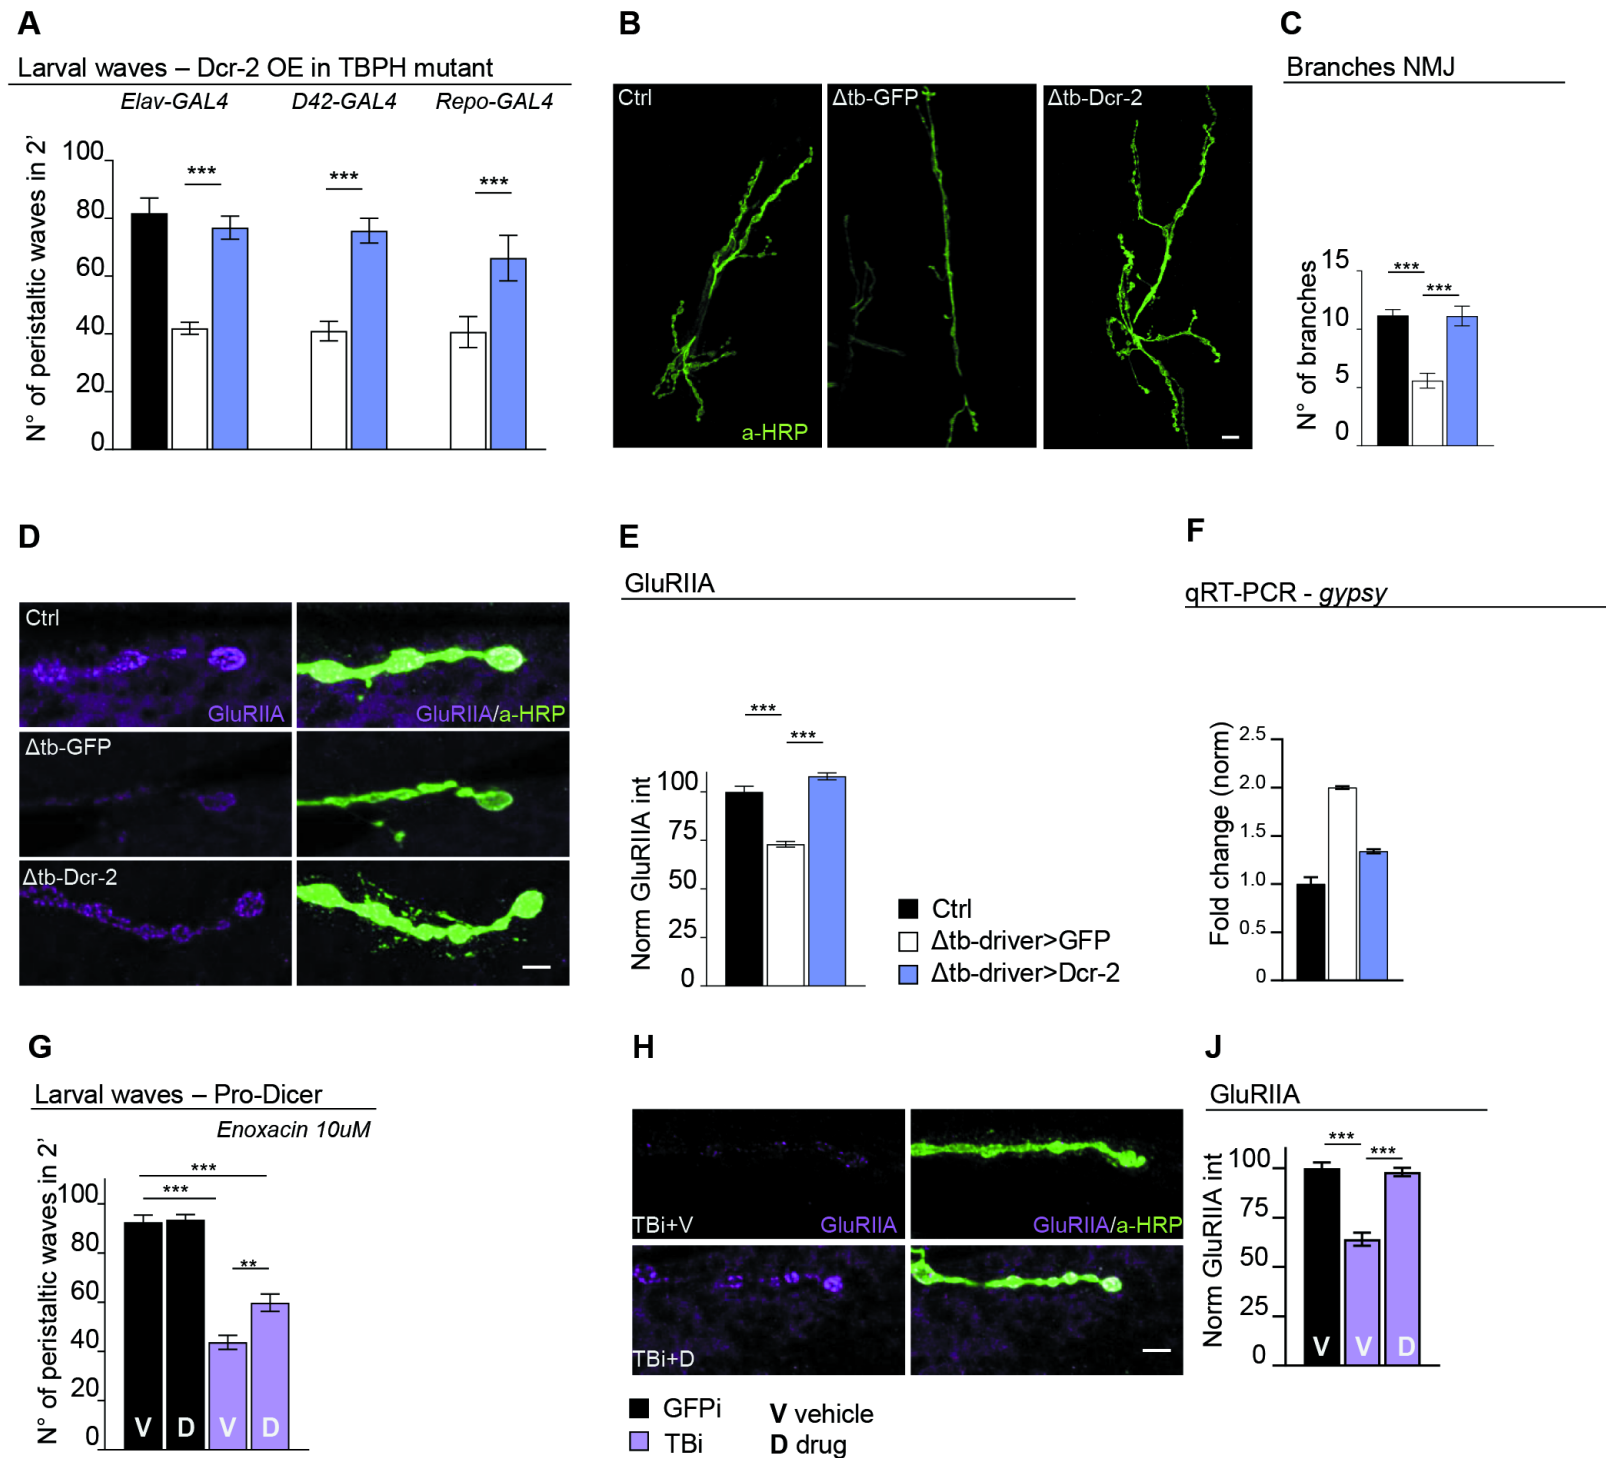

## Supplementary Material

### **Endogenous TDP-43 prevents retrotransposons activation through Dicer-2 activity and the RNA silencing machinery in Drosophila neurons**

Giulia Romano, Raffaella Klima and Fabian Feiguin\*

International Centre for Genetic Engineering and Biotechnology, Padriciano 99, 34149 Trieste, Italy.

\* Corresponding author

E-mail: [fabian.feiguin@icgeb.org](mailto:fabian.feiguin@icgeb.org)

Phone: +39-040-3757201

Fax: +39-040-226555

## Figure 1-figure supplement 1

A

| <i>TEs down regulated</i> | <i>tbph</i> <sup>Δ23/-</sup><br>(folds) | <i>tbph</i> <sup>Δ142/-</sup><br>(folds) | Family           | Class     |
|---------------------------|-----------------------------------------|------------------------------------------|------------------|-----------|
| Transposon.39             | 10.86                                   | 10.97                                    | ZAM2             | LTR       |
| Transposon.2              | 3.47                                    | 2.85                                     | 176              | LTR       |
| Transposon.97             | 3.3                                     | 3.71                                     | <i>stalker2</i>  | LTR       |
| Transposon.46             | 3.22                                    | 4.26                                     | <i>quasimodo</i> | LTR       |
| Transposon.11             | 2.18                                    | 2.38                                     | <i>copia</i>     | LTR       |
| Transposon.65             | 1.66                                    | 2.55                                     | <i>lvk</i>       | LINE-like |
| Transposon.36             | 1.66                                    | 1.59                                     | <i>opus</i>      | LTR       |

## Figure 1-figure supplement 1

Microarray results of downregulated TEs in TBPH mutants: the fold change of TEs was reported for both *tbph* mutant alleles ( $\Delta 23$  and  $\Delta 142$ ) referred to *w*<sup>1118</sup>; TEs family and class were also indicated.

## Figure 2-figure supplement 1

A

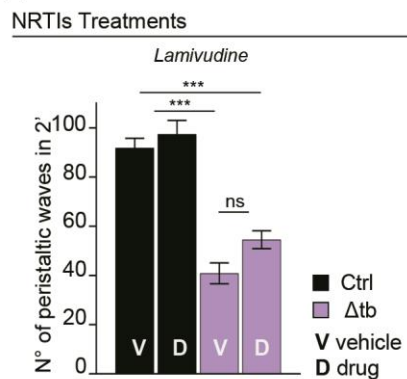

B

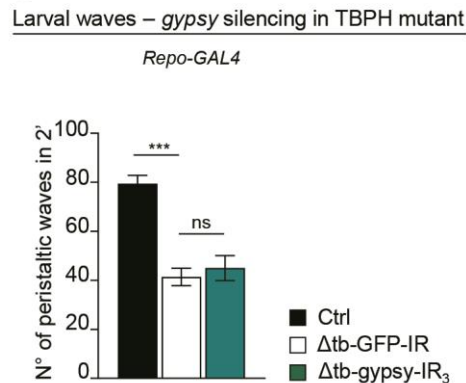

## Figure 2-figure supplement 1

(A) Number of peristaltic waves of Ctrl (*w*<sup>1118</sup>) and  $\Delta tb$  (*tbph*<sup>Δ23</sup>/*tbph*<sup>Δ23</sup>) fed with NRTIs drugs (D) compared to vehicle only (V). *n*=20. (B) Number of peristaltic waves of Ctrl (*w*<sup>1118</sup>),  $\Delta tb$ -GFP-IR (*tbph*<sup>Δ23</sup>/*tbph*<sup>Δ23</sup>; Repo-GAL4/UAS-GFP-IR) and  $\Delta tb$ -gypsy-IR<sub>3</sub> (*tbph*<sup>Δ23</sup>/*tbph*<sup>Δ23</sup>; Repo-GAL4/UAS-gypsy-IR<sub>3</sub>). *n*=20. ns=not significant, \*\*\**p*<0.001 calculated by one-way ANOVA, error bars SEM.

### Figure 3-figure supplement 1

A

qRT-PCR RNAi pathway

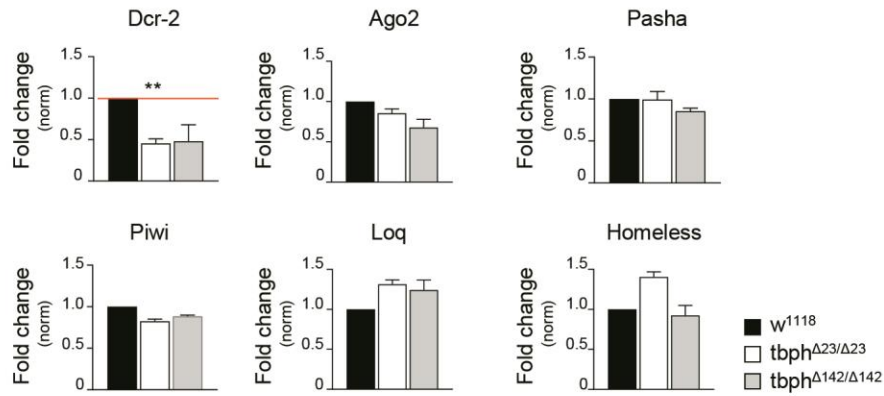

### Figure 3-figure supplement 1

Real time PCR of *Dicer-2* (*Dcr-2*), *Argonaute 2* (*Ago2*), *Pasha*, *Piwi*, *Loquacious* (*Loq*) and *Homeless* transcript levels normalized on *Rpl11* (housekeeping) in adult heads of *w<sup>1118</sup>*, *tbph<sup>Δ23</sup>/tbph<sup>Δ23</sup>* and *tbph<sup>Δ142</sup>/tbph<sup>Δ142</sup>*. *n*=2, error bars SEM.
